# Supplementary material for: Carbohydrate catabolic flexibility in the mammalian intestinal commensal Lactobacillus ruminis revealed by fermentation studies aligned to genome annotations
Source: PubMed Central journal article supplement (PMC3231919; doi:10.1186/1475-2859-10-s1-s12), 2011-08-30
Supplement: 1475-2859-10-S1-S12-S1.pdf [file 1475-2859-10-S1-S12-S1.pdf]

**Additional Table 1 - Fermentation profiles for nine *Lactobacillus ruminis* strains**

|                   |                                | <i>Lactobacillus ruminis</i> strains |     |     |     |     |                |             |            |            |
|-------------------|--------------------------------|--------------------------------------|-----|-----|-----|-----|----------------|-------------|------------|------------|
|                   |                                | Human strains                        |     |     |     |     | Bovine strains |             |            |            |
| Carbohydrate type | Carbohydrate                   | L5                                   | S21 | S23 | S36 | S38 | ATCC 25644     | ATCC 27780T | ATCC 27781 | ATCC 27782 |
| Monosaccharides   | D-Arabinose                    | -                                    | -   | -   | -   | -   | -              | -           | -          | -          |
|                   | L-Arabinose                    | -                                    | -   | -   | +   | +   | -              | -           | -          | -          |
|                   | Fructose                       | +++                                  | +++ | +++ | +++ | ++  | +++            | ++          | ++         | -          |
|                   | Galactose                      | ++                                   | ++  | +++ | +++ | ++  | ++             | ++          | ++         | ++         |
|                   | Glucose                        | ++                                   | ++  | +++ | +++ | ++  | +++            | ++          | ++         | ++         |
|                   | Lyxose                         | -                                    | -   | -   | -   | -   | -              | -           | -          | -          |
|                   | Mannose                        | ++                                   | ++  | +++ | +++ | +++ | ++             | +++         | +++        | ++         |
|                   | Melibiose                      | +                                    | +   | ++  | ++  | +   | ++             | ++          | ++         | ++         |
|                   | Ribose                         | -                                    | -   | -   | -   | -   | -              | -           | -          | -          |
| Disaccharides     | Xylose                         | -                                    | -   | -   | -   | -   | -              | -           | -          | -          |
|                   | Cellobiose                     | ++                                   | +   | ++  | ++  | ++  | ++             | ++          | ++         | ++         |
|                   | Lactose                        | ++                                   | ++  | +   | +++ | +++ | ++++           | +++         | +++        | -          |
|                   | Lactulose                      | ++                                   | ++  | +++ | ++  | ++  | +++            | +++         | ++         | -          |
|                   | Maltose                        | ++                                   | ++  | ++  | ++  | ++  | ++             | ++          | ++         | ++         |
|                   | Sucrose                        | ++                                   | ++  | +++ | +++ | ++  | +++            | +++         | ++         | ++         |
| Trisaccharides    | Trehalose                      | -                                    | -   | -   | -   | -   | -              | -           | -          | ND         |
|                   | Raffinose                      | ++                                   | ++  | +++ | +++ | +++ | +++            | +++         | +++        | ++         |
| Tetrasaccharide   | Melezitose                     | -                                    | -   | -   | -   | -   | -              | -           | -          | ND         |
|                   | Stachyose                      | +                                    | ++  | ++  | +++ | ++  | ++             | ++          | ++         | ++         |
| Oligosaccharides  | Beneo P95                      | ++                                   | ++  | +++ | +++ | ++  | +++            | +           | ++         | -          |
|                   | B-Glucotriose (B) <sup>a</sup> | ++                                   | ++  | ++  | ++  | ++  | ++             | ++          | ++         | ++         |
|                   | Raftilose P95                  | ++                                   | ++  | +   | +++ | +++ | +++            | +           | ++         | -          |
|                   | Raftilose Synergy 1            | ++                                   | ++  | +++ | ++  | ++  | +++            | -           | +          | -          |
|                   | GOS                            | ++                                   | ++  | +++ | ++  | ++  | ++             | ++          | ++         | ND         |
|                   | GOS Inulin                     | +                                    | +   | ++  | ++  | ++  | ++             | ++          | ++         | -          |
|                   | Palatinose                     | -                                    | -   | -   | +   | -   | -              | -           | -          | ND         |
| Polyols           | Polydextrose                   | +                                    | +   | -   | -   | -   | -              | -           | -          | -          |
|                   | Mannitol                       | -                                    | -   | -   | -   | -   | -              | -           | -          | ND         |
|                   | Sorbitol                       | -                                    | -   | -   | -   | -   | -              | -           | -          | ND         |
| Polysaccharides   | Xylitol                        | -                                    | -   | -   | -   | -   | -              | -           | -          | -          |
|                   | Sialic acid                    | -                                    | -   | -   | -   | -   | -              | -           | -          | ND         |
|                   | Siallylactose                  | -                                    | -   | -   | -   | -   | -              | -           | -          | -          |
|                   | Soluble Starch                 | -                                    | -   | -   | -   | -   | -              | -           | -          | ND         |
|                   | Xylan Beechwood                | -                                    | -   | -   | +   | -   | -              | -           | -          | ND         |
|                   | Xylan Oatspelts                | -                                    | -   | -   | -   | -   | -              | -           | -          | ND         |
|                   | Cellulose                      | -                                    | -   | -   | -   | -   | -              | -           | -          | -          |
|                   | B- Glucan                      | -                                    | -   | -   | -   | -   | -              | -           | -          | ND         |
|                   | Dextran                        | -                                    | -   | -   | -   | -   | -              | -           | -          | ND         |
|                   | Dextrin                        | -                                    | -   | -   | -   | -   | -              | -           | -          | ND         |
|                   | Esculin                        | -                                    | -   | -   | -   | -   | -              | -           | -          | -          |
|                   | Beneo HP                       | -                                    | -   | -   | -   | -   | -              | -           | -          | ND         |
|                   | Lichenan                       | -                                    | -   | -   | -   | -   | -              | -           | -          | ND         |
|                   | Maltodextrin                   | -                                    | -   | -   | -   | -   | -              | +           | -          | ND         |
|                   | Mannan                         | -                                    | -   | -   | -   | -   | -              | -           | -          | ND         |
|                   | Methylcellulose                | -                                    | -   | -   | -   | -   | -              | -           | -          | -          |
| Raftiline HP      | -                              | -                                    | -   | -   | -   | -   | -              | -           | -          |            |
| Raftiline HPX     | -                              | -                                    | -   | -   | -   | -   | -              | -           | ND         |            |
| Raftiline ST      | ++                             | -                                    | ++  | ++  | ++  | ++  | -              | -           | -          |            |
| Algal sources     | Red Powder                     | +                                    | +   | +   | +   | +   | +              | +           | +          | -          |
|                   | Green Powder                   | -                                    | -   | -   | -   | -   | -              | -           | -          | ND         |

(-) no growth (OD ≤ 0.1); (+) weak growth (OD 0.1 – 0.23); (++) moderate growth (OD 0.2 – 0.5); (+++) strong growth

(OD 0.5 – 0.8); (++++) very strong growth (OD 0.8 – 1.0); (ND) not determined. a: β-glucan hydrolysate
