# Supplementary material for: Carbohydrate catabolic flexibility in the mammalian intestinal commensal Lactobacillus ruminis revealed by fermentation studies aligned to genome annotations
Source: PubMed Central journal article supplement (PMC3231919; doi:10.1186/1475-2859-10-s1-s12), 2011-08-30
Supplement: 1475-2859-10-S1-S12-S9.pdf [file 1475-2859-10-S1-S12-S9.pdf]

*Lactobacillus ruminis* ATCC 27781

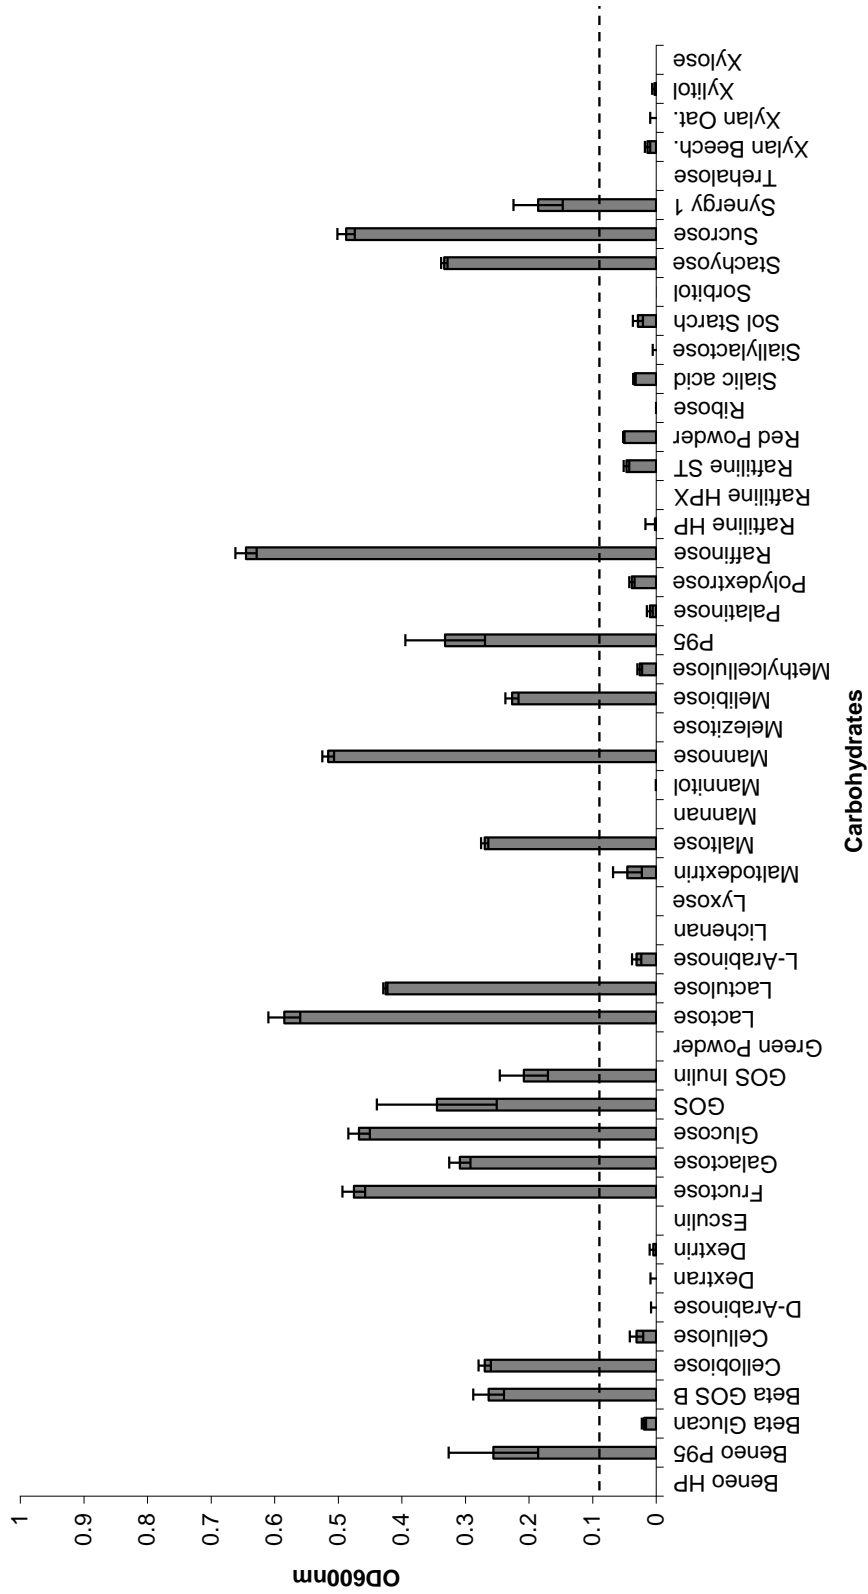

Figure1: Growth profile for *L. ruminis* ATCC 27781. Values plotted are the differences in optical density between time 0 and time 48h  $\pm$  standard error. Dashed line, cut-off point
