# Supplementary material for: Carbohydrate catabolic flexibility in the mammalian intestinal commensal Lactobacillus ruminis revealed by fermentation studies aligned to genome annotations
Source: PubMed Central journal article supplement (PMC3231919; doi:10.1186/1475-2859-10-s1-s12), 2011-08-30
Supplement: 1475-2859-10-S1-S12-S19.pdf [file 1475-2859-10-S1-S12-S19.pdf]

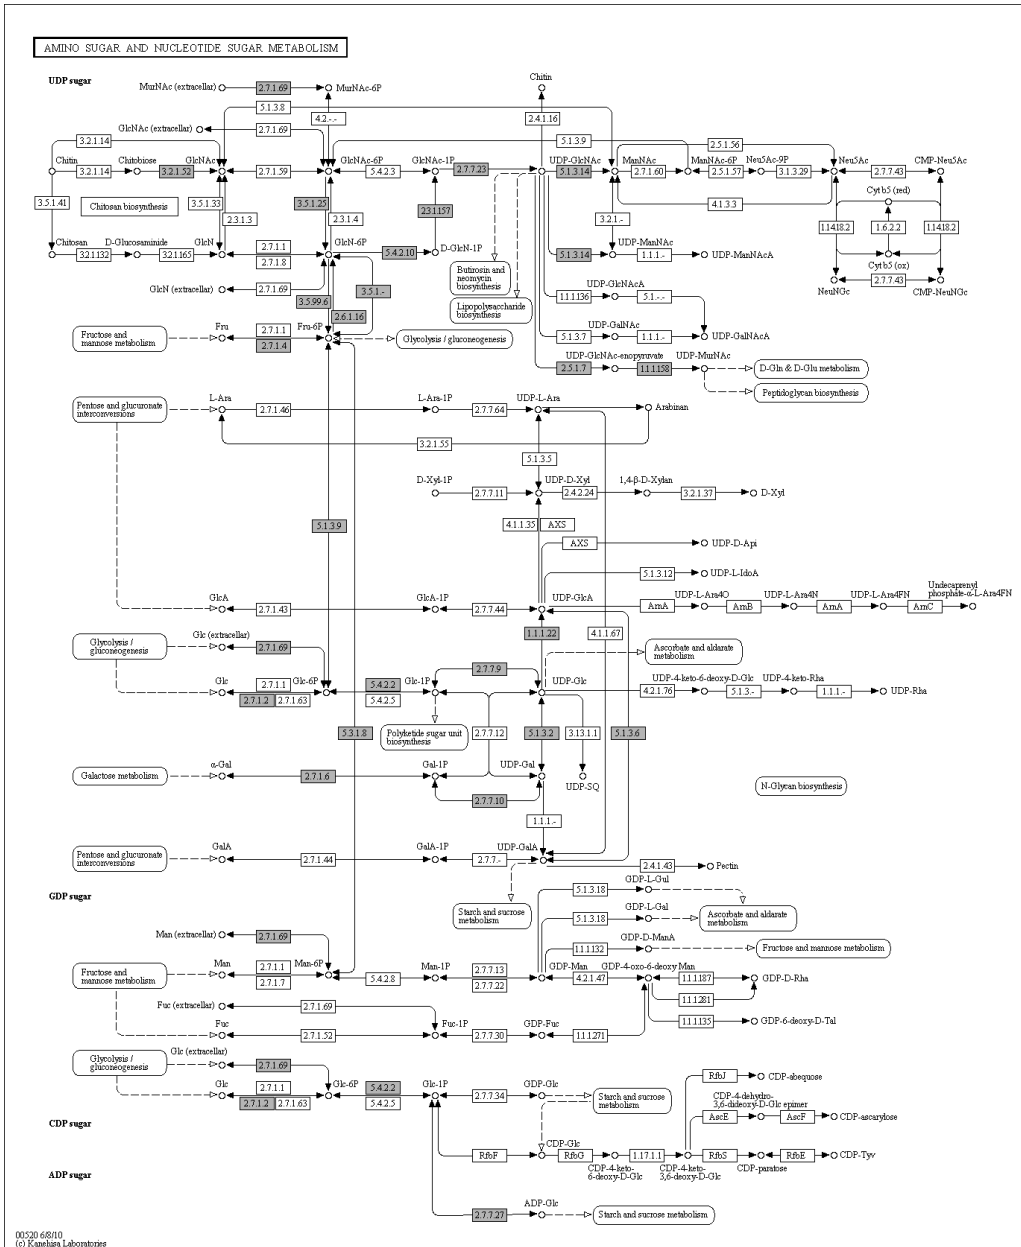

Figure 1: Amino and nucleotide sugar metabolism map representing enzymes present in both *L. ruminis* ATCC 25644 and ATCC 27782. Grey boxes, enzymes present in both sequenced strains
