# Supplementary material for: Carbohydrate catabolic flexibility in the mammalian intestinal commensal Lactobacillus ruminis revealed by fermentation studies aligned to genome annotations
Source: PubMed Central journal article supplement (PMC3231919; doi:10.1186/1475-2859-10-s1-s12), 2011-08-30
Supplement: 1475-2859-10-S1-S12-S28.pdf [file 1475-2859-10-S1-S12-S28.pdf]

**Additional Table 2 - Carbohydrates used in this study**

| Carbohydrate type    | Name                                                  | Source                               | Degree of Polymerisation       |
|----------------------|-------------------------------------------------------|--------------------------------------|--------------------------------|
| Monosaccharide       | Glucose                                               | Fisher Scientific                    | n/a                            |
|                      | Fructose                                              | Sigma Aldrich, Poole, UK             | n/a                            |
|                      | Galactose                                             | Sigma Aldrich, Poole, UK             | n/a                            |
|                      | D – Arabinose                                         | Sigma Aldrich, Poole, UK             | n/a                            |
|                      | L - Arabinose                                         | Sigma Aldrich, Poole, UK             | n/a                            |
|                      | Mannose                                               | Sigma Aldrich, Poole, UK             | n/a                            |
|                      | Ribose                                                | Sigma Aldrich, Poole, UK             | n/a                            |
|                      | Lyxose                                                | Sigma Aldrich, Poole, UK             | n/a                            |
|                      | Xylose                                                | Sigma Aldrich, Poole, UK             | n/a                            |
|                      | Sialic acid                                           | Friesland Foods, Zwolle, Netherlands | n/a                            |
| Disaccharide         | Cellobiose                                            | Sigma Aldrich, Poole, UK             | 2                              |
|                      | Trehalose                                             | Sigma Aldrich, Poole, UK             | 2                              |
|                      | Sucrose                                               | Sigma Aldrich, Poole, UK             | 2                              |
|                      | Maltose                                               | Sigma Aldrich, Poole, UK             | 2                              |
|                      | Lactose                                               | Sigma Aldrich, Poole, UK             | 2                              |
|                      | Lactulose                                             | Sigma Aldrich, Poole, UK             | 2                              |
|                      | Melibiose                                             | Sigma Aldrich, Poole, UK             | 2                              |
|                      | Palatinose                                            | Sigma Aldrich, Poole, UK             | 2                              |
| Trisaccharide        | Melezitose                                            | Sigma Aldrich, Poole, UK             | 3                              |
|                      | Raffinose                                             | Sigma Aldrich, Poole, UK             | 3                              |
| Tetrasaccharide      | Stachyose                                             | Sigma Aldrich, Poole, UK             | 4                              |
| Oligosaccharide      | Soluble Starch                                        | BDH Analar                           | -                              |
|                      | Maltodextrin                                          | Cargill-Cerestar                     | Avg. 7                         |
|                      | Polydextrose                                          | Danisco                              | Avg. 12                        |
|                      | Galactooligosaccharide (GOS)                          | Friesland Foods ,Zwolle, Netherlands | 2 to 8                         |
|                      | GOS inulin                                            | Friesland Foods, Zwolle, Netherlands | Unknown                        |
|                      | $\beta$ -Glucotriose B ( $\beta$ -glucan hydrolysate) | Megazyme, Co. Wicklow, Ireland       | 3                              |
|                      | Raftilose P95                                         | Orafti, Tienen, Belgium              | 2 to 8                         |
|                      | Raftilose Synergy 1 (oligofructose enriched inulin)   | Orafti, Tienen, Belgium              | 2 to 8                         |
|                      | Beneo P95                                             | Orafti, Tienen, Belgium              | 2 to 8                         |
|                      | Dextran                                               | Sigma Aldrich, Poole, UK             | -                              |
|                      | Dextrin                                               | Sigma Aldrich, Poole, UK             | -                              |
|                      | Polysaccharide                                        | $\beta$ Glucan                       | Megazyme, Co. Wicklow, Ireland |
| Mannan               |                                                       | Megazyme, Co. Wicklow, Ireland       | 15                             |
| Lichenan             |                                                       | Megazyme, Co. Wicklow, Ireland       | 80-400                         |
| Beneo HP             |                                                       | Orafti, Tienen, Belgium              | >23                            |
| Raftiline ST         |                                                       | Orafti, Tienen, Belgium              | $\geq 10$                      |
| Raftiline HPX        |                                                       | Orafti, Tienen, Belgium              | $\geq 23$                      |
| Raftiline HP         |                                                       | Orafti, Tienen, Belgium              | >23                            |
| Xylan from Beechwood |                                                       | Sigma Aldrich, Poole, UK             | 100-200                        |
| Xylan from Oatspelts |                                                       | Sigma Aldrich, Poole, UK             | 100-200                        |
| Cellulose            |                                                       | Sigma Aldrich, Poole, UK             | 300-1700                       |
| Methylcellulose      |                                                       | Sigma Aldrich, Poole, UK             | -                              |
| Polyol               | Mannitol                                              | Sigma Aldrich, Poole, UK             | n/a                            |
|                      | Sorbitol                                              | Sigma Aldrich, Poole, UK             | n/a                            |
|                      | Xylitol                                               | Sigma Aldrich, Poole, UK             | n/a                            |
| Algal source         | Green Powder                                          | Algae derived powder                 | Unknown                        |
|                      | Red Powder                                            | Algae derived powder                 | Unknown                        |
| Unknown              | Esculin                                               | Sigma Aldrich, Poole, UK             | -                              |
|                      | Sialyllactose                                         | Friesland Foods, Zwolle, Netherlands | -                              |

(?), Unknown carbohydrate type; (-), unknown degree of polymerisation; n/a,

monosaccharides
